# Supplementary material
Source: PubMed Central journal article supplement (PMC5502730)
Supplement: NIHMS866608-supplement-1.pdf [file NIHMS866608-supplement-1.pdf]

**Figure S1. SVM performance of combination of input features, Related to STAR Methods**  
Metadata refers to patients metadata (Age, Sex, Race and BMI). SDI refers to Shannon diversity index

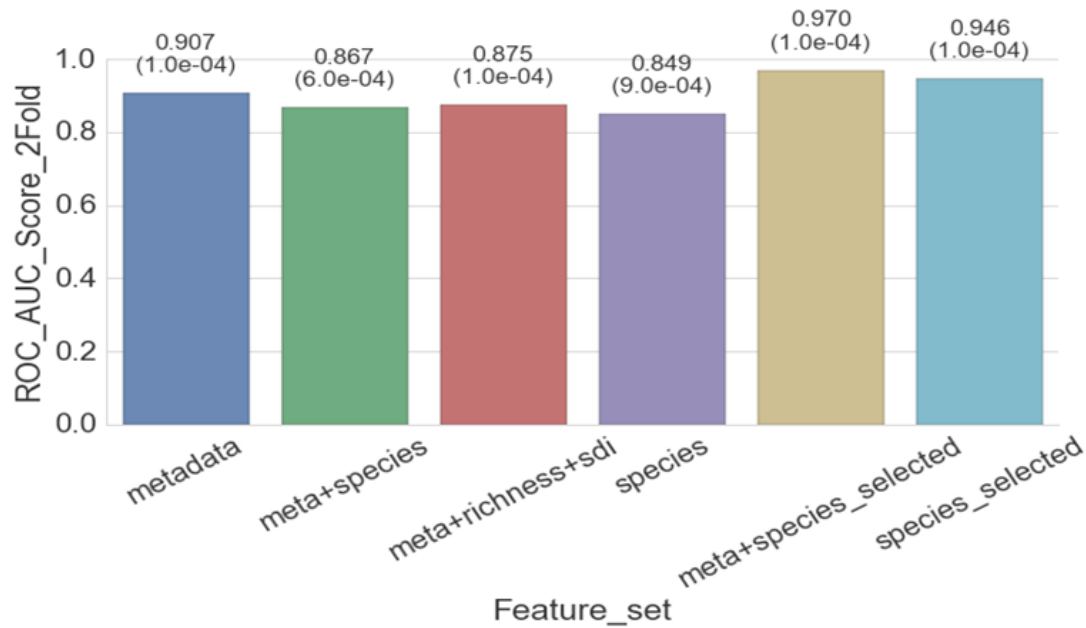

**Supplemental Figure 1.** SVM performance of combination of input features. Metadata refers to patient metadata (Age, Sex, Race, and BMI). SDI refers to Shannon diversity index.

### Figure S2. Log fold change of compounds, Related to Figure 3

Log<sub>2</sub> ratios (G2/G1) using the median intensities of compounds detected in serum samples and associated with pathways reconstructed in species bins

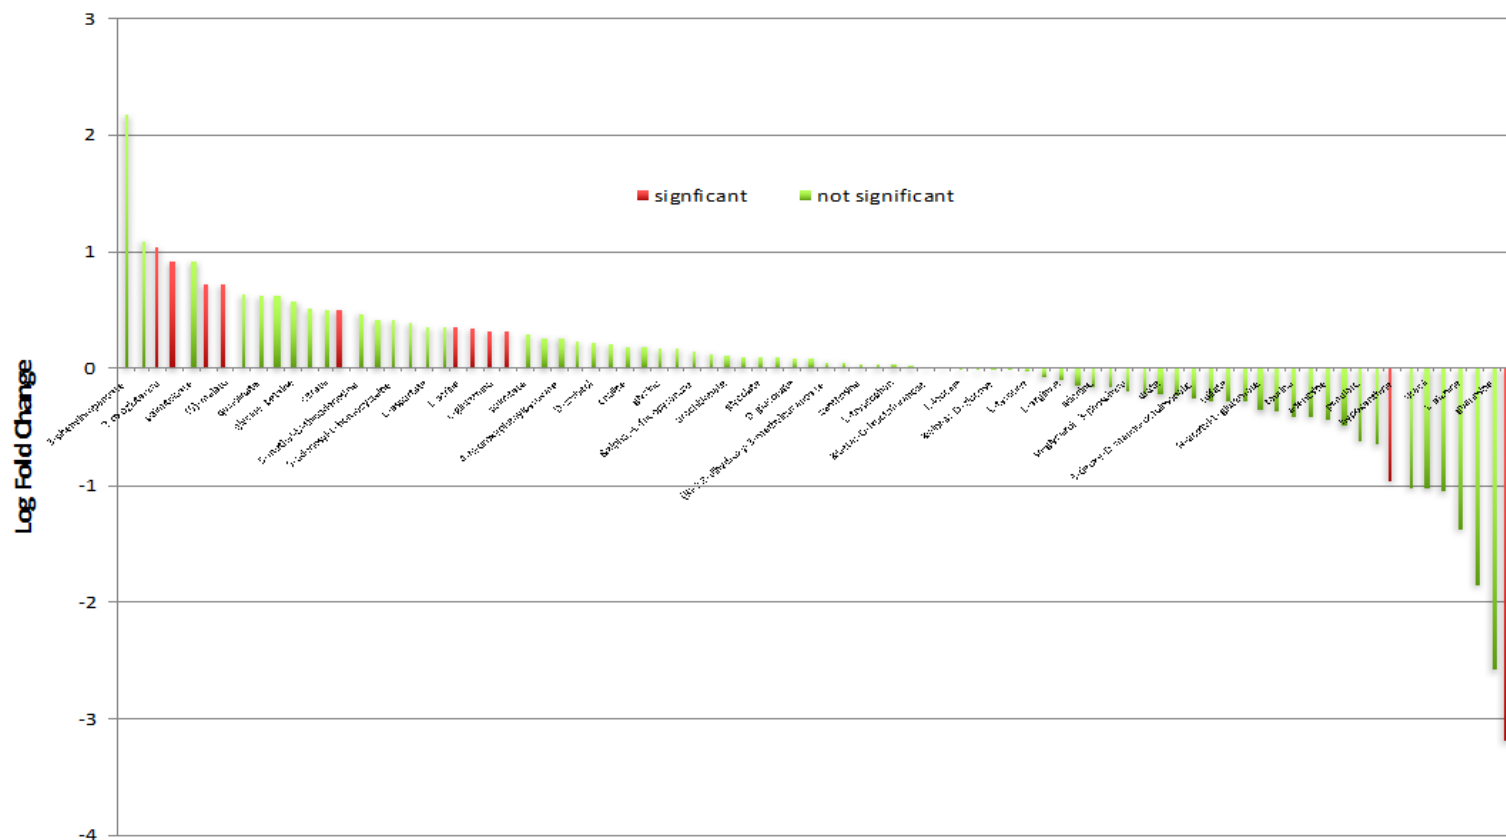

Supplemental Figure 2. Log fold change of compounds. Log<sub>2</sub> ratios (G2/G1) using the median intensities of compounds detected in serum samples and associated with pathways reconstructed in species bins.

**Table S2.** Metagenome based relative abundances of enzymes associated with SCFA and ethanol metabolism, and their enrichment in group G2 (log fold change is given in the last column), Related to Table 4.

| EC        | Metabolite            | Function                             | p-val     | #g1 reconstructed | #g2 reconstructed | median g1 abundance | median g2 abundance | g2 enrichment * |
|-----------|-----------------------|--------------------------------------|-----------|-------------------|-------------------|---------------------|---------------------|-----------------|
| 1.1.1.1   | Ethanol               | Alcohol dehydrogenase                | 0.37      | 72                | 14                | 3.04E-03            | 3.33E-03            | 1.34E-01        |
| 1.1.1.2   | Ethanol               | Alcohol dehydrogenase (NADP(+))      | 0.16      | 54                | 7                 | 8.95E-06            | 7.50E-07            | -3.58E+00       |
| 1.1.2.7   | Ethanol / Methanol    | Methanol dehydrogenase               | Not found | 0                 | 0                 | na                  | na                  | na              |
| 1.1.2.8   | Ethanol               | Alcohol dehydrogenase (cytochrome c) | 0.87      | 2                 | 0                 | 0.00E+00            | 0.00E+00            | na              |
| 1.1.1.27  | L-Lactate             | L-lactate dehydrogenase              | 0.06      | 72                | 14                | 1.72E-03            | 1.12E-03            | -6.15E-01       |
| 1.1.1.28  | D-Lactate             | D-lactate dehydrogenase              | 0.03      | 72                | 14                | 3.08E-04            | 6.29E-04            | 1.03E+00        |
| 2.3.1.54  | Formate               | Formate C-acetyltransferase          | 0.52      | 72                | 14                | 1.42E-03            | 1.32E-03            | -1.07E-01       |
| 1.1.99.33 | Formate Utilization   | Formate dehydrogenase (acceptor)     | 0.44      | 1                 | 2                 | 0.00E+00            | 0.00E+00            | na              |
| 3.6.1.7   | Acetate               | Acylphosphate phosphohydrolase       | 0.03      | 72                | 14                | 4.08E-04            | 2.90E-04            | -4.93E-01       |
| 2.7.2.12  | Acetate               | Acetate kinase (diphosphate)         | Not found |                   |                   |                     |                     | na              |
| 6.2.1.13  | Acetate               | Acetate--CoA ligase (ADP-forming)    | 0.58      | 12                | 1                 | 0.00E+00            | 0.00E+00            | na              |
| 2.7.2.1   | Acetate               | Acetate kinase                       | 0.03      | 72                | 14                | 3.20E-03            | 2.76E-03            | -2.16E-01       |
| 1.3.5.4   | Succinate             | Fumarate reductase (quinol)          | 0.97      | 30                | 6                 | 0.00E+00            | 0.00E+00            | na              |
| 1.3.5.1   | Succinate             | Succinate dehydrogenase (quinone)    | 0.89      | 72                | 13                | 2.51E-04            | 2.94E-04            | 2.30E-01        |
| 2.8.3.8   | Butyrate / Acetate    | Acetate CoA-transferase              | 0.43      | 72                | 14                | 4.64E-04            | 5.53E-04            | 2.52E-01        |
| 2.7.2.7   | Butyrate              | Butyrate kinase                      | 0.93      | 72                | 14                | 9.11E-04            | 9.61E-04            | 7.74E-02        |
| 2.8.3.1   | Propionate / Buterate | Propionate CoA-transferase           | 0.93      | 4                 | 1                 | 0.00E+00            | 0.00E+00            | na              |
| 2.7.2.15  | Propionate            | Propionate kinase                    | 0.27      | 39                | 8                 | 2.05E-06            | 2.06E-05            | 3.33E+00        |

**Table S3.** Pathways with top fold change differences (in relative abundance) across the groups G1 and G2, Related to Figure 3.

| Metacyc Class                      | Pathway                                                  | MetaCycID              | Log FC | p-val | #G2 | G2 median | #G1 | G1 median |
|------------------------------------|----------------------------------------------------------|------------------------|--------|-------|-----|-----------|-----|-----------|
| Steroids-Degradation               | androstenedione degradation                              | PWY-6944               | -2.81  | 0.18  | 7   | 2.08E-03  | 50  | 1.45E-02  |
| NUCLEO-DEG                         | thymine degradation                                      | PWY-6430               | -2.47  | 0.21  | 7   | 6.31E-04  | 39  | 3.49E-03  |
| NUCLEO-DEG                         | uracil degradation I (reductive)                         | PWY-3982               | -2.47  | 0.21  | 7   | 6.31E-04  | 39  | 3.49E-03  |
| Nucleotide-Biosynthesis            | pyrimidine deoxyribonucleotides de novo biosynthesis III | PWY-6545               | -2.46  | 0.03  | 7   | 5.97E-03  | 63  | 3.28E-02  |
| SECONDARY-METABOLITE-BIOSYNTHESIS  | rhizoctin A and B biosynthesis                           | PWY-7510               | -2.33  | 0.64  | 7   | 1.14E-03  | 43  | 5.72E-03  |
| Cofactor-Biosynthesis              | trans, trans-farnesyl diphosphate biosynthesis           | PWY-5123               | -2.18  | 0.01  | 8   | 1.17E-02  | 67  | 5.32E-02  |
| Alcohol-Degradation                | L-1,2-propanediol degradation                            | PWY-7013               | -1.7   | 0.84  | 7   | 6.31E-04  | 37  | 2.05E-03  |
| Amino-Acid-Degradation             | methionine degradation II                                | PWY-701                | -1.7   | 0.85  | 7   | 6.31E-04  | 37  | 2.05E-03  |
| Polyamine-Biosynthesis             | putrescine biosynthesis II                               | PWY-43                 | -1.68  | 0.50  | 7   | 1.66E-03  | 40  | 5.29E-03  |
| Nucleotide-Biosynthesis            | adenine and adenosine salvage II                         | PWY-6605               | -1.3   | 0.36  | 7   | 5.87E-03  | 51  | 1.45E-02  |
| CARBOXYLATES-DEG                   | glycolate and glyoxylate degradation I                   | GLYCOLATEMET-PWY       | 1.95   | 0.14  | 12  | 1.50E-02  | 43  | 3.89E-03  |
| Noncarbon-Nutrients                | nitrate reduction IV (dissimilatory)                     | PWY-5674               | 1.95   | 0.23  | 9   | 8.66E-03  | 37  | 2.24E-03  |
| AT5G03860-MONOMER                  | glyoxylate cycle                                         | GLYOXYLATE-BYPASS      | 2.15   | 0.16  | 10  | 9.92E-03  | 37  | 2.24E-03  |
| CHEMOAUTOTROPHIC-ENERGY-METABOLISM | hydrogen oxidation I (aerobic)                           | P283-PWY               | 2.15   | 0.16  | 10  | 9.92E-03  | 37  | 2.24E-03  |
| NUCLEO-DEG                         | pyrimidine deoxyribonucleotides dephosphorylation        | PWY-7206               | 2.21   | 0.08  | 11  | 1.77E-02  | 40  | 3.82E-03  |
| Carbohydrates-Biosynthesis         | CMP-N-acetylneuraminate biosynthesis II (bacteria)       | PWY-6139               | 2.32   | 0.19  | 8   | 2.58E-02  | 39  | 5.18E-03  |
| Cofactor-Biosynthesis              | glutathione redox reactions II                           | GLUT-REDOX-PWY         | 2.39   | 0.12  | 10  | 1.58E-02  | 39  | 3.03E-03  |
| Alcohol-Degradation                | ethanol degradation I                                    | ETOH-ACETYLCOA-ANA-PWY | 2.52   | 0.12  | 10  | 1.50E-02  | 38  | 2.61E-03  |
| AROMATIC-COMPOUNDS-DEGRADATION     | p-cymene degradation to p-cumate                         | PWY-741                | 3.35   | 0.14  | 10  | 9.92E-03  | 36  | 9.74E-04  |

|                    |                                                   |          |      |      |    |          |    |          |
|--------------------|---------------------------------------------------|----------|------|------|----|----------|----|----------|
| Lipid-Biosynthesis | phospholipid remodeling<br>(phosphatidate, yeast) | PWY-7417 | 3.35 | 0.14 | 10 | 9.92E-03 | 36 | 9.74E-04 |
|--------------------|---------------------------------------------------|----------|------|------|----|----------|----|----------|

**Table S4.** Species selected by a Random Forest model trained with data from an age-balanced group of patients. Related to STAR Methods

Species in bold overlap with the 37 species selected by our original model. Mean decrease in Gini index and log ratios of median species abundances in G2 and G1 are also listed,

| Species                             | Mean Decrease Gini | Log2(G2/G1) |
|-------------------------------------|--------------------|-------------|
| <b>Oscillibacter_sp._CAG.241</b>    | 2.41               | -5.11       |
| <b>Firmicutes_bacterium_CAG.129</b> | 1.25               | -4.57       |
| <b>Firmicutes_bacterium_CAG.170</b> | 1                  | -3.73       |
| [Ruminococcus]_obeum                | 1.62               | -3.68       |
| <b>[Bacteroides]_pectinophilus</b>  | 0.36               | -3.02       |
| Oscillibacter_sp._1.3               | 0.94               | -2.78       |
| <b>Holdemania_filiformis</b>        | 1.21               | -2.47       |
| <b>Firmicutes_bacterium_CAG.83</b>  | 1.47               | -2.33       |
| Firmicutes_bacterium_CAG.103        | 0.79               | -1.44       |

**Table S5.** Top features selected by Linear SVM, Related to Figure 2

Species in bold are those that are also included in the Random Forest model.

| Rank | Feature                                    | Coefficient |
|------|--------------------------------------------|-------------|
| 1    | <b><i>Streptococcus parasanguinis</i></b>  | 1.02        |
| 2    | <b><i>Firmicutes</i> bacterium CAG:129</b> | -0.90       |
| 3    | <i>Firmicutes</i> bacterium CAG:24         | -0.89       |
| 4    | Age                                        | 0.83        |
| 5    | Asian                                      | -0.80       |
| 6    | <b><i>Clostridium</i> sp. CAG:43</b>       | -0.80       |
| 7    | <b><i>Oscillibacter</i> sp. CAG:241</b>    | -0.80       |
| 8    | <i>Firmicutes</i> bacterium CAG:103        | 0.77        |
| 9    | <b><i>Ruminococcus</i> sp. CAG:90</b>      | -0.77       |
| 10   | <b><i>Ruminococcus obeum</i> CAG:39</b>    | -0.76       |
| 11   | <b><i>Eubacterium rectale</i></b>          | -0.72       |
| 12   | <i>Alistipes shahii</i>                    | 0.72        |
| 13   | <i>Clostridium symbiosum</i>               | 0.66        |
| 14   | <b><i>Clostridium</i> sp._7_3_54FAA</b>    | 0.61        |
| 15   | <i>Clostridium</i> sp._CAG:58              | -0.58       |
| 16   | <b><i>Bacteroides</i> sp._1_1_30</b>       | -0.56       |
| 17   | <i>Bacteroides</i> sp._1_1_14              | -0.43       |
| 18   | Female                                     | 0.42        |
| 19   | <i>Escherichia coli</i>                    | -0.40       |
| 20   | <b><i>Bacteroides fingoldii</i></b>        | 0.38        |
| 21   | <b><i>Blautia</i> sp._CAG:37</b>           | -0.35       |
| 22   | Hispanic                                   | 0.14        |

**Table S6.** Species that have correlated abundances to representative species that are shown in bold, Related to Figure 3

**Clostridium\_sp.\_SS2.1**

Lachnospiraceae\_bacterium\_5\_1\_63FAA

Lachnospiraceae\_bacterium\_CAG.25

Anaerostipes\_hadrus

butyrate.producing\_bacterium\_SSC.2

**Bacteroides\_sp.\_D2**

Lachnospiraceae\_bacterium\_5\_1\_63FAA

Bacteroides\_uniformis\_CAG.3

**Bacteroides\_vulgatus**

Lachnospiraceae\_bacterium\_5\_1\_63FAA

Bacteroides\_vulgatus\_CAG.6

**Dorea\_longicatena**

Dorea\_longicatena\_CAG.42

**Eubacterium\_hallii**

Eubacterium\_hallii\_CAG.12

**Eubacterium\_rectale**

Eubacterium\_rectale\_CAG.36

**Lachnospiraceae\_bacterium\_3\_1\_46FAA**

Lachnospiraceae\_bacterium\_1\_1\_57FAA

Lachnospiraceae\_bacterium\_8\_1\_57FAA

**Lachnospiraceae\_bacterium\_2\_1\_58FAA**

Ruminococcus\_gnavus

**Oscillibacter\_sp.\_1.3**

Oscillibacter\_sp.\_CAG.155

**Ruminococcus\_sp.\_5\_1\_39BFAA**

Ruminococcus\_sp.\_CAG.9

**Streptococcus\_parasanguinis**

Streptococcus\_salivarius
